# Supplementary material for: HOMs and SOA formation from the oxidation of α- and β-phellandrenes by NO 3 radicals
Source: Copernicus journal article supplement (doi:10.5194/egusphere-2024-3419), 2024-11-08
Supplement: Supplementary file 1 [file egusphere-2024-3419-supplement.pdf]

## Supporting Information

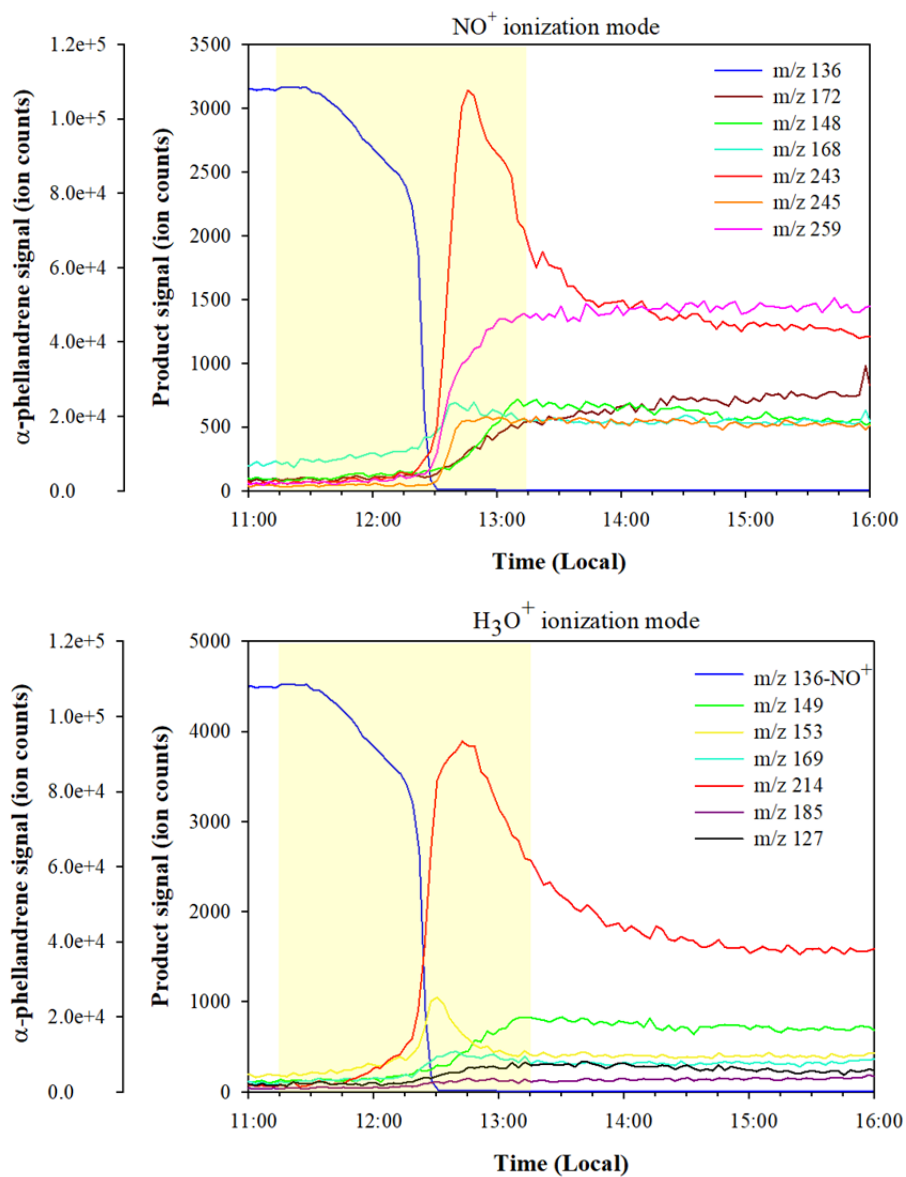

5 Figure S1: Example of typical time profiles of α-phellandrene and products detected with PTR-ToF-MS (NO<sup>+</sup> and H<sub>3</sub>O<sup>+</sup> ionization modes) for the experiment of 06/03/2021. The N<sub>2</sub>O<sub>5</sub> injection period is shown by the yellow area.

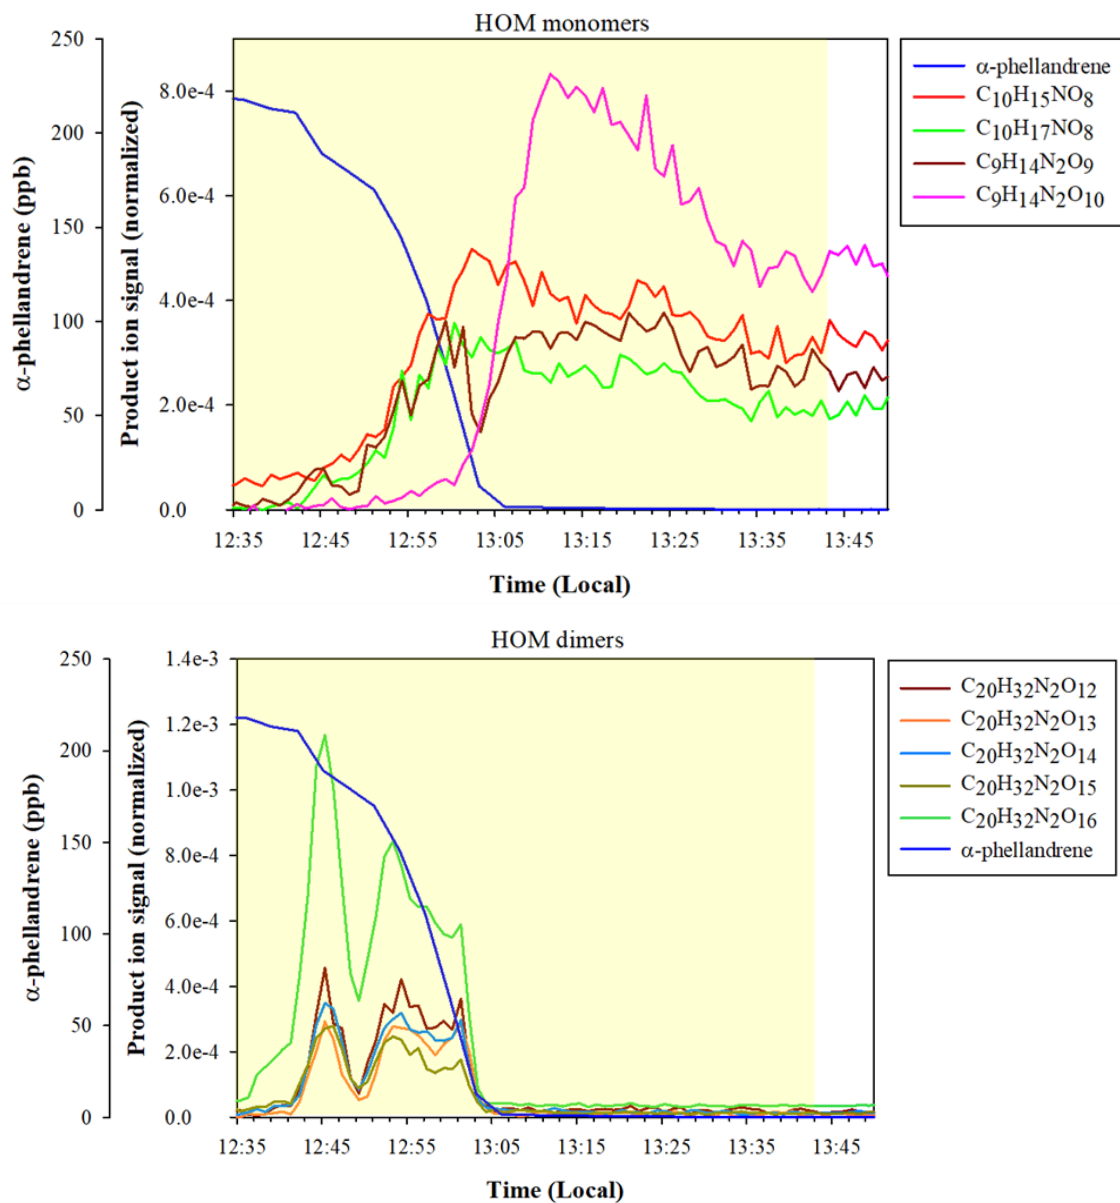

**Figure S2: Time profiles of a selection of gas-phase HOM monomers and dimers produced by the oxidation of  $\alpha$ -phellandrene by  $NO_3$  radical (experiment 06/02/2021). The  $N_2O_5$  injection period is shown by the yellow area.**

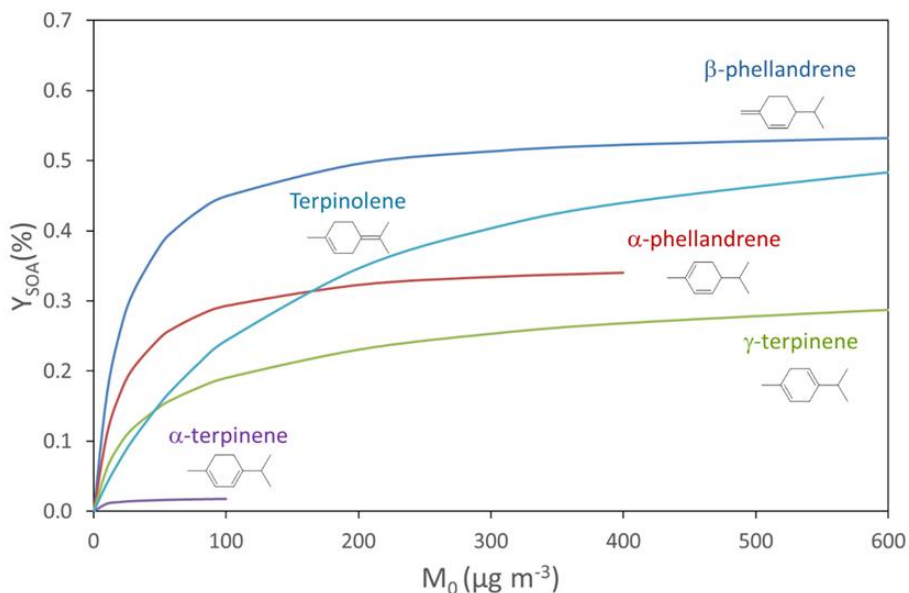

10

**Figure S3:** Odum parametrization describing the dependence of the SOA yields with the aerosol content (in  $\mu\text{g}/\text{m}^3$ ) for  $\alpha$ - and  $\beta$ -phellandrenes (this study),  $\alpha$ - and  $\gamma$ -terpinenes (Fouqueau et al., 2020) and terpinolene (Fouqueau et al., 2022).

**Table S1:** Products detected by PTR-ToF-MS in  $\text{H}_3\text{O}^+$  and  $\text{NO}^+$  ionization modes for the oxidation by  $\text{NO}_3$  radical of  $\alpha$ - and  $\beta$ -phellandrenes: raw formula, molecular weight, detected mass, ionization process ( $\text{H}^+$  as proton adduct;  $\text{NO}^+$  as  $\text{NO}^+$  adduct; CT as charge transfer), and behavior.

15

| Molecule                                |                           | $\text{H}_3\text{O}^+$ ionization mode |              |                   | $\text{NO}^+$ ionization mode |               |                   |
|-----------------------------------------|---------------------------|----------------------------------------|--------------|-------------------|-------------------------------|---------------|-------------------|
| Raw formula                             | M ( $\text{g mol}^{-1}$ ) | m/z                                    | Process      | Behavior          | m/z                           | Process       | Behavior          |
| <b><math>\alpha</math>-phellandrene</b> |                           |                                        |              |                   |                               |               |                   |
| $\text{C}_3\text{H}_6\text{O}$          | 58                        | 59.0383                                | $\text{H}^+$ | Primary-Secondary | 88.0268                       | $\text{NO}^+$ | Primary-Secondary |
| $\text{C}_3\text{H}_4\text{O}_2$        | 72                        | 73.0133                                | $\text{H}^+$ | Secondary         | 102.0035                      | $\text{NO}^+$ | Secondary         |
| $\text{C}_7\text{H}_{10}\text{O}_2$     | 126                       | 127.0457                               | $\text{H}^+$ | Secondary         | /                             | /             | /                 |
| $\text{C}_7\text{H}_{12}\text{O}_2$     | 128                       | 129.0452                               | $\text{H}^+$ | Secondary         | /                             | /             | /                 |
| $\text{C}_5\text{H}_{10}\text{O}_4$     | 134                       | /                                      | /            | /                 | 164.0281                      | $\text{NO}^+$ | Secondary         |
| $\text{C}_7\text{H}_{10}\text{O}_3$     | 142                       | /                                      | /            | /                 | 172.0275                      | CT            | Secondary         |
| $\text{C}_6\text{H}_{12}\text{O}_4$     | 148                       | 149.0441                               | $\text{H}^+$ | Secondary         | 148.0484                      | CT            | Secondary         |
| $\text{C}_{10}\text{H}_{16}\text{O}$    | 152                       | 153.0848                               | $\text{H}^+$ | Primary           | /                             | /             | /                 |
| $\text{C}_{10}\text{H}_{16}\text{O}_2$  | 168                       | 169.0742                               | $\text{H}^+$ | Primary           | 168.0816                      | CT            | Primary           |
| $\text{C}_{10}\text{H}_{16}\text{O}_3$  | 184                       | 185.0637                               | $\text{H}^+$ | Secondary         | /                             | /             | /                 |
| $\text{C}_{10}\text{H}_{15}\text{NO}_4$ | 213                       | 214.0419                               | $\text{H}^+$ | Primary           | 243.0469                      | $\text{NO}^+$ | Primary           |

|                                                 |     |          |                |           |          |                 |           |
|-------------------------------------------------|-----|----------|----------------|-----------|----------|-----------------|-----------|
| C <sub>10</sub> H <sub>15</sub> NO <sub>5</sub> | 229 | 230.0278 | H <sup>+</sup> | Primary   | 259.0345 | NO <sup>+</sup> | Primary   |
| C <sub>10</sub> H <sub>15</sub> NO <sub>6</sub> | 245 | /        | /              | /         | 245.0431 | CT              | Secondary |
| <b>β-phellandrene</b>                           |     |          |                |           |          |                 |           |
| C <sub>3</sub> H <sub>6</sub> O                 | 58  | 59.0365  | H <sup>+</sup> | Primary   | 88.0198  | NO <sup>+</sup> | Primary   |
| C <sub>7</sub> H <sub>12</sub> O <sub>2</sub>   | 128 | 129.0438 | H <sup>+</sup> | Secondary | 128.0340 | CT              | Secondary |
| C <sub>5</sub> H <sub>10</sub> O <sub>4</sub>   | 134 | /        | /              | /         | 164.0050 | NO <sup>+</sup> | Secondary |
| C <sub>3</sub> H <sub>3</sub> NO <sub>5</sub>   | 133 | /        | /              | /         | 163.9707 | NO <sup>+</sup> | Secondary |
| C <sub>9</sub> H <sub>14</sub> O                | 138 | 139.0622 | H <sup>+</sup> | Primary   | /        | /               | /         |
| C <sub>6</sub> H <sub>12</sub> O <sub>4</sub>   | 148 | 149.0394 | H <sup>+</sup> | Primary   | /        | /               | /         |
| C <sub>10</sub> H <sub>16</sub> O               | 152 | 153.0670 | H <sup>+</sup> | Primary   | /        | /               | /         |
| C <sub>10</sub> H <sub>16</sub> O <sub>2</sub>  | 168 | 169.0610 | H <sup>+</sup> | Primary   | 168.0551 | CT              | Primary   |
| C <sub>9</sub> H <sub>13</sub> O <sub>3</sub>   | 170 | 171.0396 | H <sup>+</sup> | Secondary | /        | /               | /         |
| C <sub>10</sub> H <sub>15</sub> NO <sub>4</sub> | 213 | 214.0263 | H <sup>+</sup> | Primary   | /        | /               | /         |
| C <sub>10</sub> H <sub>15</sub> NO <sub>5</sub> | 229 | 230.0278 | H <sup>+</sup> | Detected  | /        | /               | /         |

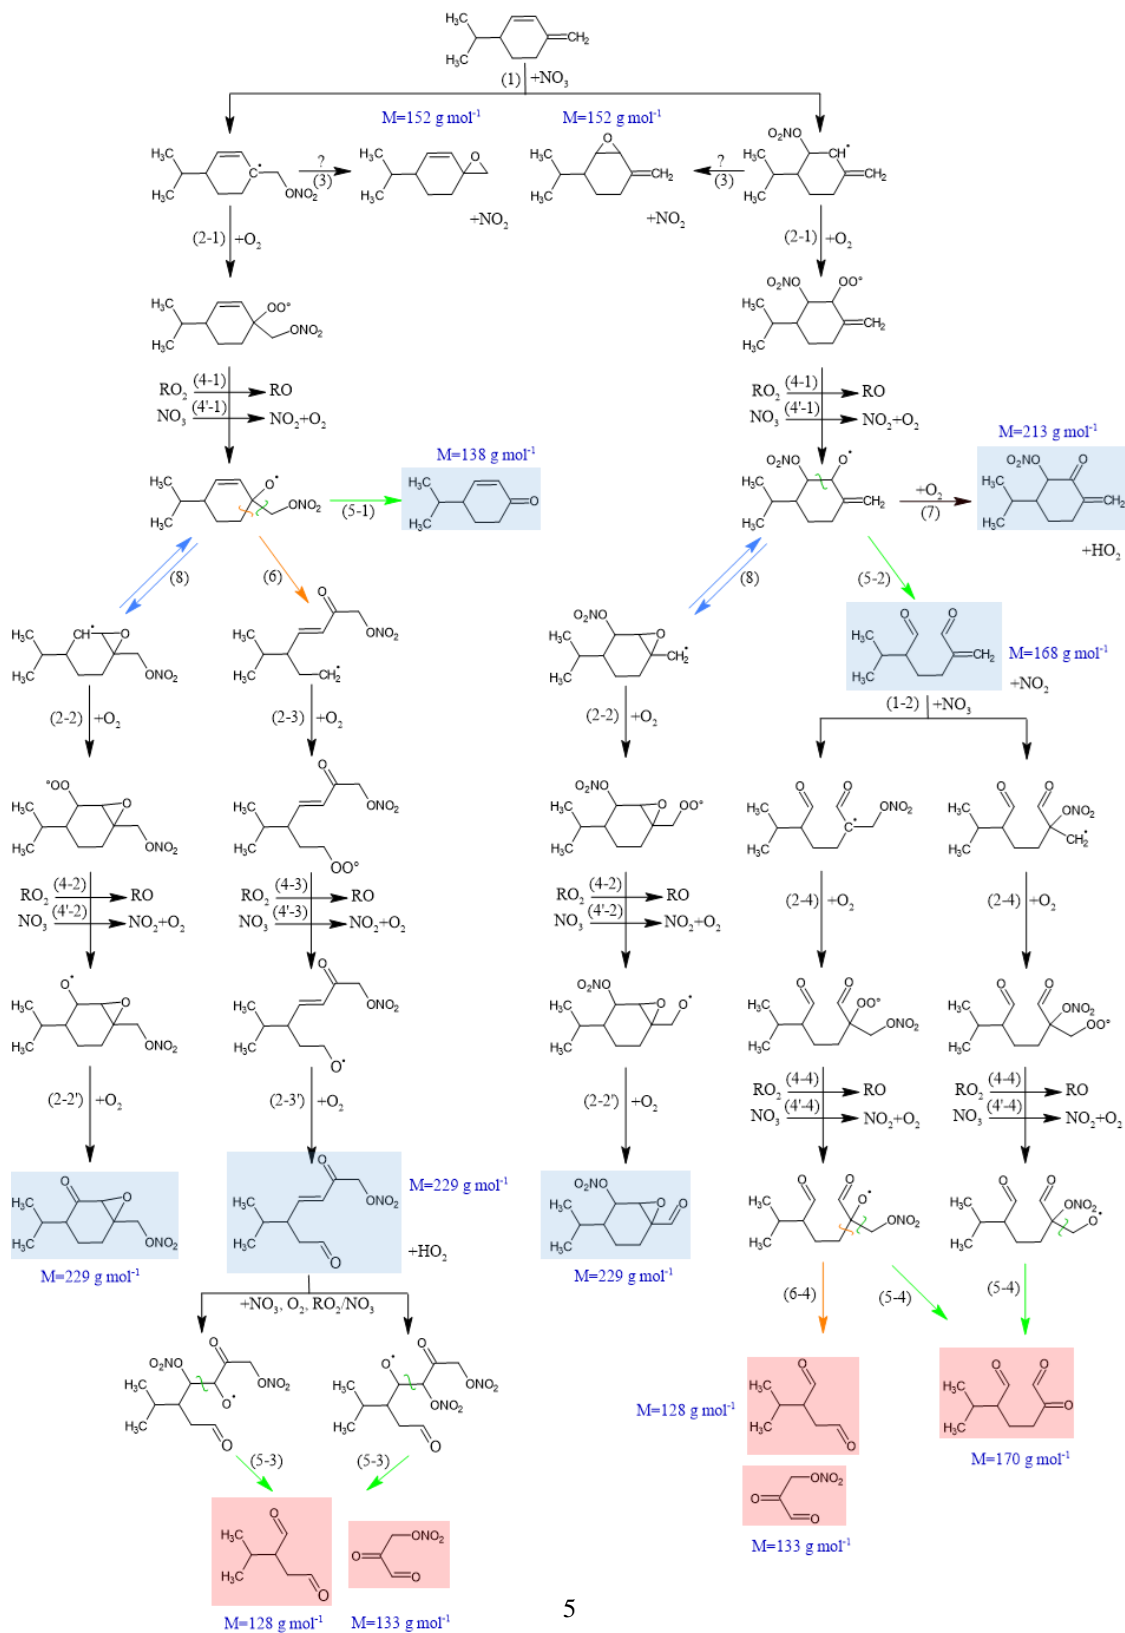

Figure S4: Proposed mechanism for the reaction  $\beta$ -phellandrene+NO<sub>3</sub>. First-generation products are colored in blue, and second-generation ones are colored in red.

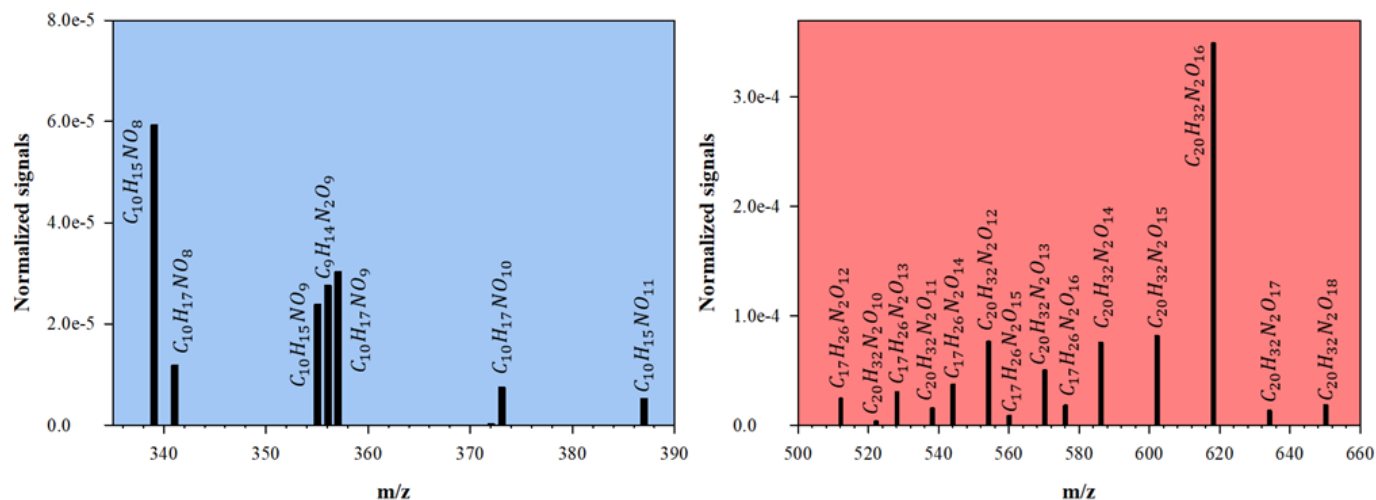

20

Figure S5: Average mass spectra of gas-phase HOMs for the NO<sub>3</sub>-oxidation of  $\alpha$ -phellandrene (average performed over 10 min following the start of the oxidation - experiment 02/06/2021). Labels display raw formulas of detected species, excluding the nitrate reagent ion cluster, but the  $m/z$  values (x-axis) include the nitrate mass (61.9883  $m/z$ ). Product signals are normalized to the reagent ion signals.

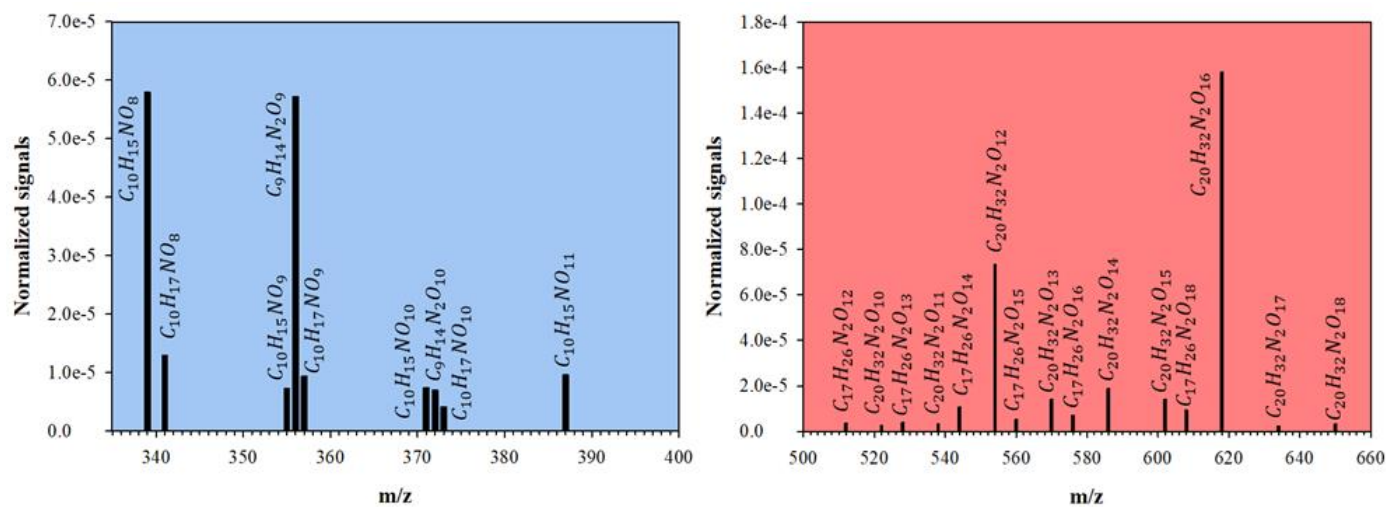

25

Figure S6: Average mass spectra measured of gas-phase HOMs for the NO<sub>3</sub>-oxidation of  $\beta$ -phellandrene (average performed over 10 min following the start of the oxidation - experiment 03/24/2021). Labels display raw formulas of detected species, excluding the nitrate reagent ion cluster, but the  $m/z$  values (x-axis) include the nitrate mass (61.9883  $m/z$ ). Product signals are normalized to the reagent ion signals.

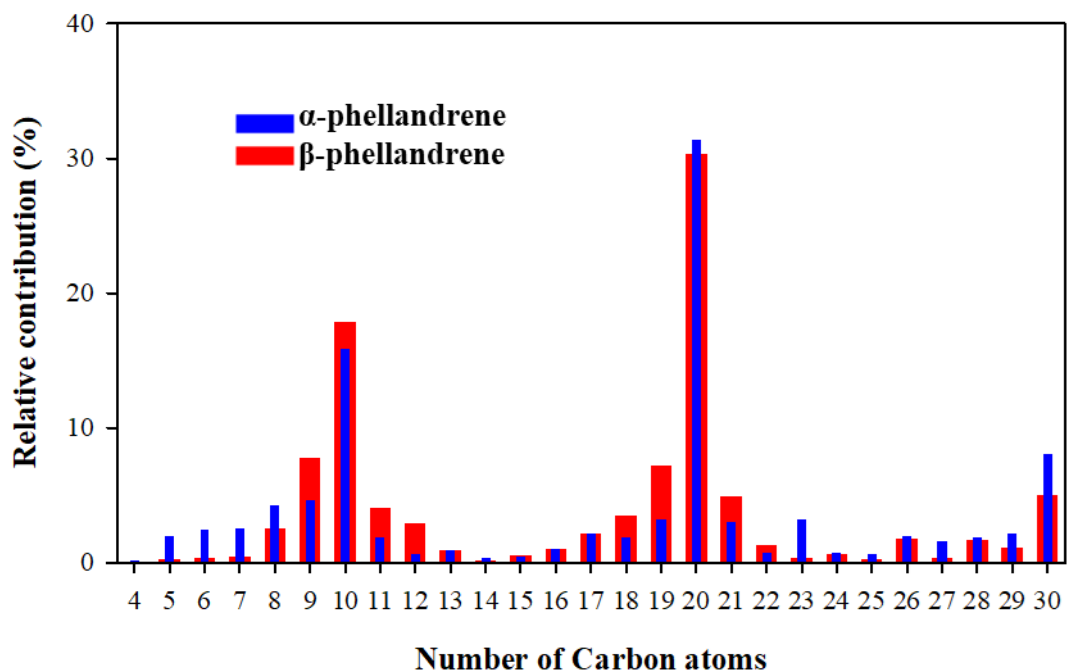

30

Figure S7. Distribution of the products detected in the aerosol phase as a function of the number of carbon atoms, for  $\alpha$ - and  $\beta$ -phellandrenes.
